# Supplementary material for: Helicobacter pylori CagA induces tumor suppressor gene hypermethylation by upregulating DNMT1 via AKT-NFκB pathway in gastric cancer development
Source: PubMed Central journal article supplement (PMC4891084; doi:10.18632/oncotarget.7125), 2016-02-02
Supplement: oncotarget-07-09788-s001.pdf [file oncotarget-07-09788-s001.pdf]

## Helicobacter pylori CagA induces tumor suppressor gene hypermethylation by upregulating DNMT1 via AKT-NFκB pathway in gastric cancer development

### Supplementary Materials

**Supplementary Table S1: Primer sequences used in the present study**

| GeneSequence5,-3, |                                                      |
|-------------------|------------------------------------------------------|
| GAPDH-F           | CTCTGCTCCTCCTGTTTCGAC                                |
| GAPDH-R           | TTAAAAGCAGCCCTGGTGAC                                 |
| CagA-F            | GATAACAGGCAAGCTTTTGAGG                               |
| CagA-R            | CTGCAAAAAGATTGTTTGGCAGA                              |
| Dnmt1-F           | TACCTGGACGACCCTGACCTC                                |
| Dnmt1-R           | CGTTGGCATCAAAGATGGACA                                |
| Dnmt3a-F          | TATTGATGAGCGCACAAAGAGAGC                             |
| Dnmt3a-R          | GGGTGTTCCAGGGTAACATTGAG                              |
| Dnmt3b-F          | GGCAAGTTCTCCGAGGTCTCTG                               |
| Dnmt3b-R          | TGGTACATGGCTTTTCGATAGGA                              |
| MGMT-F            | ATGGACAAGGATTGTGAAATG                                |
| MGMT-R            | GAAAACGGGATGGTGAAGAGC                                |
| MGMT-u-F          | GTGTAGTTGTTTTGAGTAGGATTGG                            |
| MGMT-u-R          | ACCTTAATTTACCAAATAACCCATA                            |
| MGMT-m-F          | CGTAGTCGTTTCGAGTAGGATC                               |
| MGMT-m-R          | ACCTTAATTTACCAAATAACCCGTA                            |
| P16-u-F           | TTATTCGCGGGTGGGGTGTT                                 |
| P16-u-R           | CAACCCCAAACCACAACCAA                                 |
| P16-m-F           | TTATTAGAGGGTGGGGCGC                                  |
| P16-m-R           | GACCCCGAACCGCGACCGA                                  |
| hmlH1-u-F         | GTGTTTTGATGTTTGTAGGT                                 |
| hmlH1-u-R         | TCCACACTCTTCCAAAAACA                                 |
| hmlH1-m-F         | TTTCGATTTCGTAGGTTCCGCC                               |
| hmlH1-m-R         | GCACTCTTCCGAAAACGAAG                                 |
| PTEN-u-F          | GAGAGATGGTGGTGGTTGT                                  |
| PTEN-u-R          | AACTCCCCAAAACACTACC                                  |
| PTEN-m-F          | GGCGGCGGTCGCGGTTTC                                   |
| PTEN-m-R          | GACTCCCCGAAAACGCTAC                                  |
| DNMT1-WT-F        | TGAGGGGCTTTTCTATCCTGT                                |
| DNMT1-WT-R        | TTCAGGTGCTGCCCTGTTTC                                 |
| DNMT1-MT1-F       | ATGACCCCGAAAGGAATCCTGTTGTCGAACTGCTGGTTACACACACACACA  |
| DNMT1-MT1-R       | GTTTCGACAACAGGATTCTTTTCGGGGTCATTCCAGCAACAAAATTTTTTTG |
| DNMT1-MT2-F       | GGGGAGTCCCCCAAGGGAAACAGGGCAGCACCTGAATTCTGGAGGTCC     |
| DNMT1-MT2-R       | TGCCCTGTTCCCTTGGGGGACTCCCCGTGAGGTCACTCTTTCTGACC      |
